# Supplementary material for: Remodeling of structurally reinforced (TPU+PCL/PCL)-Hep electrospun small-diameter bilayer vascular grafts interposed in rat abdominal aortas
Source: Royal Society of Chemistry journal article supplement (doi:10.1039/d1bm01653a), 2022-01-01
Supplement: d1bm01653a1.pdf [file d1bm01653a1.pdf]

***Supporting Information***

**Remodeling of Structurally Reinforced (TPU+PCL/PCL)-Hep  
Electrospun Small Diameter Bilayer Vascular Grafts Interposed in  
Rat Abdominal Aortas**

Zhiping Fang,<sup>a</sup> Yuehao Xing,<sup>b</sup> Hang Wang,<sup>a, c</sup> Xue Geng,<sup>a</sup> Ai-ying Zhang,<sup>a</sup> Yongquan Gu,<sup>b</sup> and Zeng-guo Feng<sup>a</sup>

- a. School of Materials Science and Engineering, Beijing Institute of Technology, Beijing 100081, China
- b. Department of Vascular Surgery, Xuanwu Hospital and Institute of Vascular Surgery, Capital Medical University, Beijing 100053, China
- c. National Institutes for Food and Drug Control, Beijing 102629, China

**Table S1.** Quantitative measurement of the structural parameters of (TPU+PCL/PCL)-Hep BLVG and PCL-Hep SLVG.

| Contents               | (TPU+PCL/PCL)-Hep BLVG | PCL-Hep SLVG |
|------------------------|------------------------|--------------|
| Porosity (%)           | 61.2 ± 4.3             | 75.3 ± 3.1   |
| Luminal diameter (mm)  | 2.0 ± 0.05             | 2.0 ± 0.05   |
| Suture retention ( N ) | 1.23 ± 0.05            | 1.15 ± 0.08  |
| Compliance (%/100mmHg) | 4.51 ± 0.11            | 3.72 ± 0.06  |
| Burst pressure (mmHg)  | 1403 ± 101             | 1311 ± 105   |

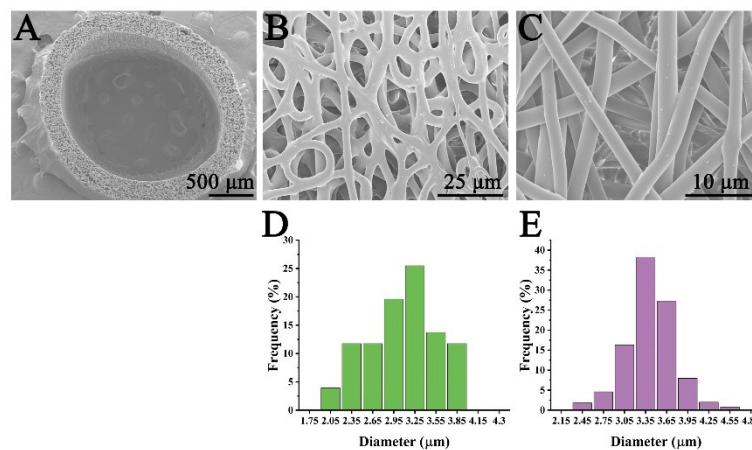

**Figure S1.** Morphology observation of electrospun PCL-Hep SLVG, and TPU mat. (A) SEM image for the cross-section of PCL-Hep SLVG. (B) SEM image of PCL-Hep SLVG. (C) SEM image of TPU mat. (D) Microfiber diameter distribution of PCL-Hep SLVG. (E) Microfiber diameter distribution of TPU mat.

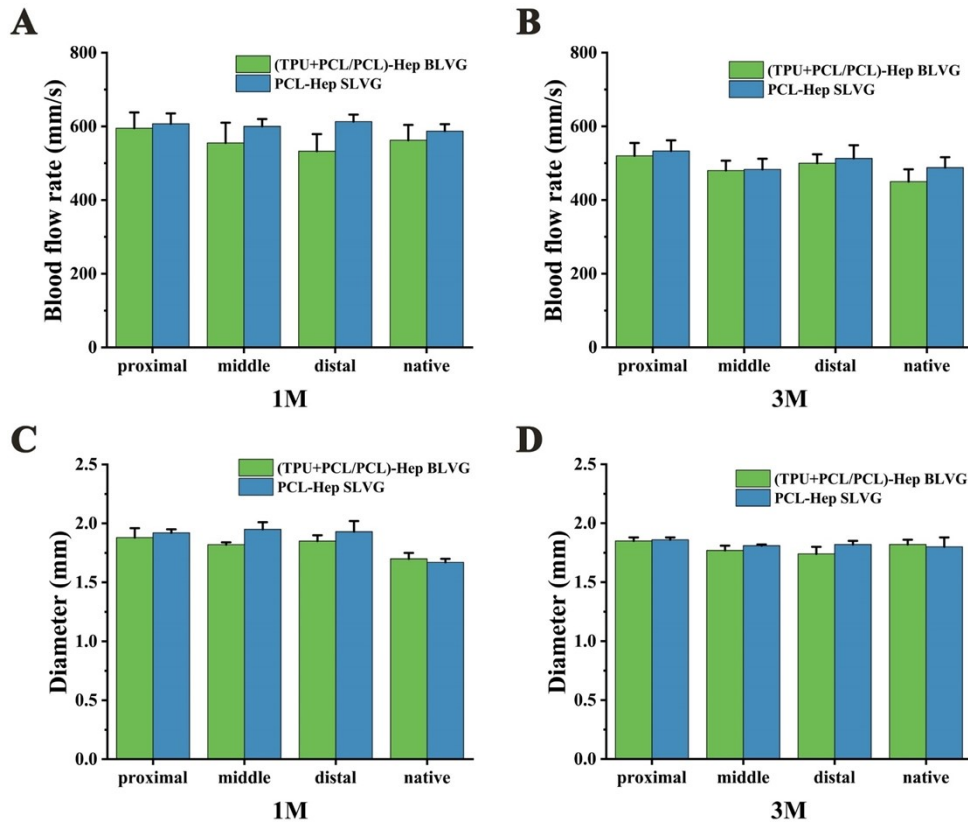

**Figure S2.** Blood flow rate (A, B) and internal diameter (C, D) of (TPU+PCL/PCL)-Hep BLVGs, PCL-Hep SLVG and native blood vessel after 1 and 3 month implantation.

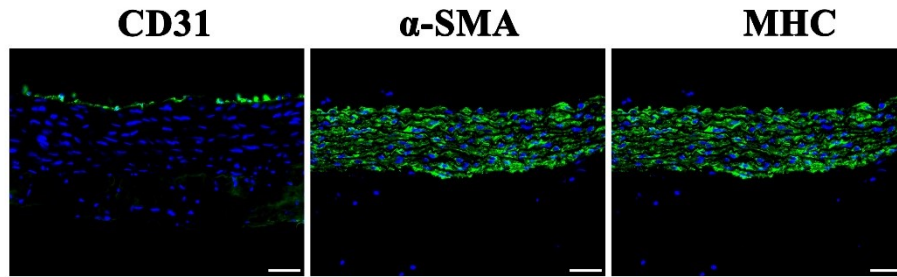

**Figure S3.** Endothelial cells and smooth muscle cells of native artery were detected by anti-CD 31, anti- $\alpha$ -SMA and anti-MHC antibody. Nuclei were stained with DAPI (blue). Scale bar, 50  $\mu$ m.

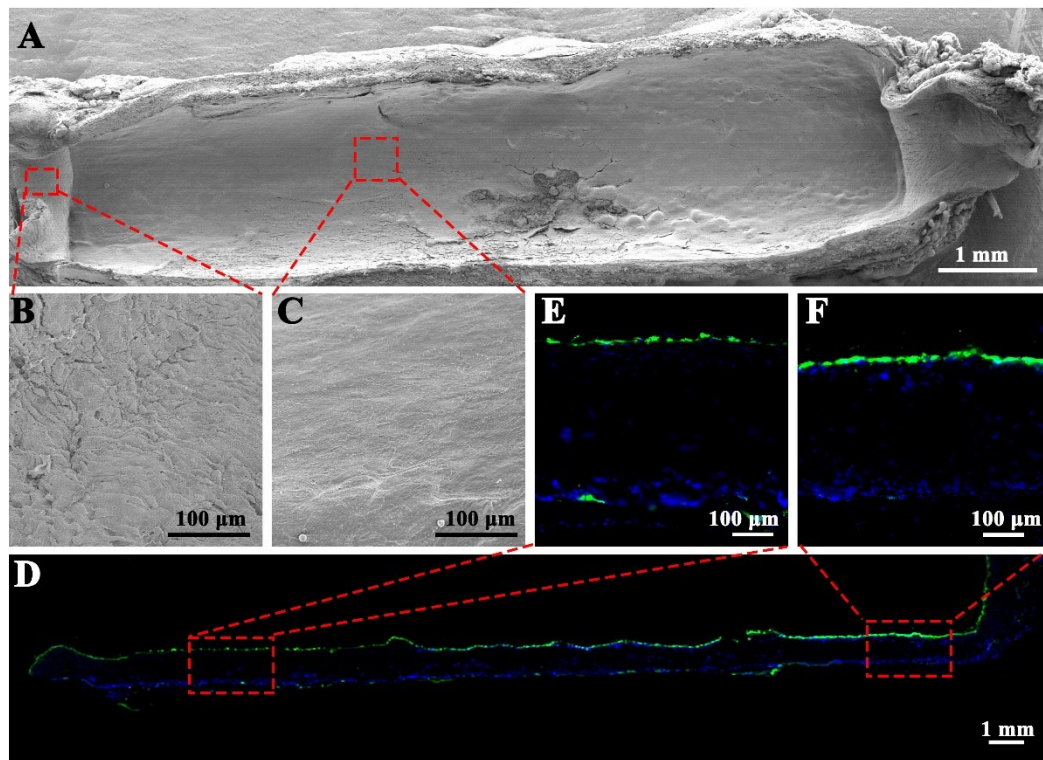

**Figure S4.** Endothelialization of (TPU+PCL/PCL)-Hep BLVGs at 6 months. (A) SEM of explant which was cut longitudinally into two pieces. Higher magnification micrographs showed the luminal surface of native artery (B) and the middle part of the graft (C). (D) Coverage of lumen by endothelial cells (CD31, green). Higher magnification micrographs showed CD31<sup>+</sup> cells (E), and near the suture site in the graft (F). Nuclei were stained with DAPI (blue).

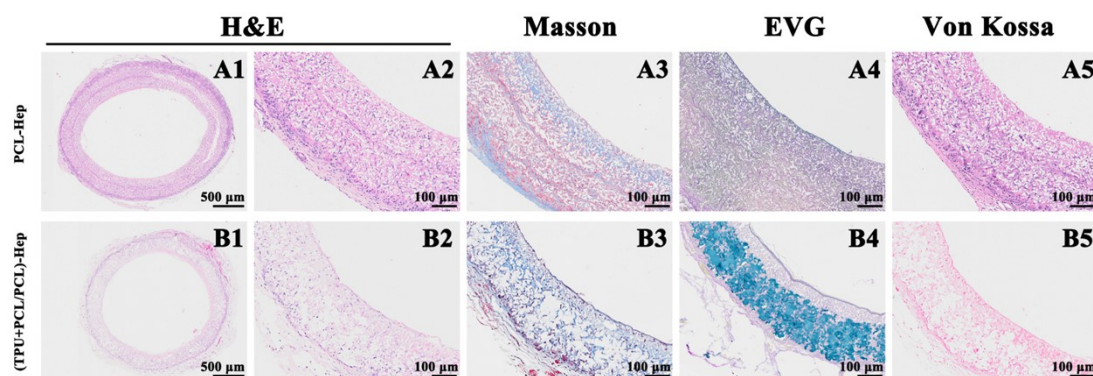

**Figure S5.** Characterization of ECM deposition in one month after implantation. Microscopic photos of cross-sections stained with H&E (A1-A2, B1-B2), Masson for collagen (blue, A3, B3), EVG for elastin (black, A4, B4) and Von Kossa for calcification (black, A5, B5).
